# Supplementary material for: Al–Si ordering in the framework of leucite and Cs-exchanged leuciteElectronic supplementary information (ESI) available: Fig. S1 and S2 – twin boundary between phases I and II in leucite of P1121/a symmetry. See http://www.rsc.org/suppdata/cp/b1/b111447f/
Source: Royal Society of Chemistry journal article supplement (doi:10.1039/b111447f), 2002-05-27
Supplement: figure.doc [file figure.doc]

**Supplementary Data** for the paper

“Al-Si ordering in the framework of leucite and Cs-exchanged leucite”

by T. Takaishi, S. Yamazaki and A. Yamazaki

Twin boundary between Phases I and II, in leucite of *P*1121/*a* symmetry.

Fig. S1 Twin boundary || (010) :

Al atom on D3 site is displaced to C3, in order to avoid the Al-O-Al

configuration.

Supplement 1

Fig. S2 3D representation of the twin boundary || (001).

Sites enclosed by □ are disturbed, that is, Si on A3 or C3 sites changes

from Si(3Al) to Si(2Al).

Supplement 2
